# Supplementary material
Source: MDPI journal article supplement (https://www.mdpi.com/2227-9040/8/3/87)
Supplement: s1 [file s1]

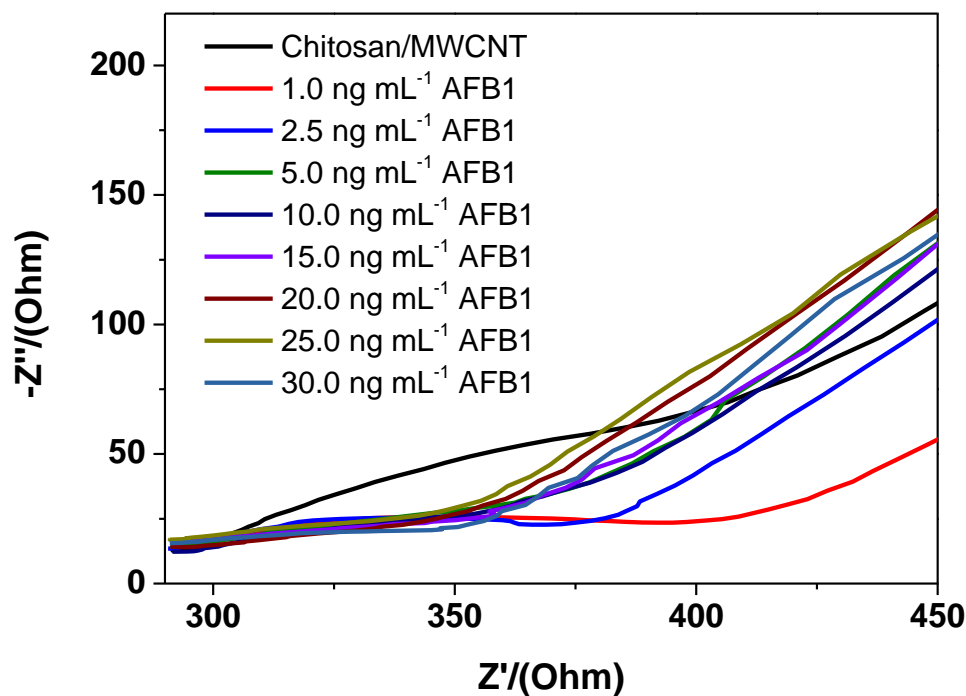

**Figure S1.** Electrochemical impedance measurements for the electrode modified with chitosan/MWCNT films and with the anti-AFB1 immobilized after the antibody/antigen incubation time with different concentrations of AFB1 (1 to 30 ng·mL<sup>-1</sup>).
